# Supplementary material
Source: publisher figshare collection journal article supplement (https://karger.figshare.com/ndownloader/files/28577184)
Supplement: Supplementary file 1 [file 28577184]

**Phenology of the tree species at Ampasy.** Food Availability Index (FAI) and peaks of Young Leaves (YL), Flowers (FL), and Ripe Fruits (RF) production per species at Ampasy from July 2015 to June 2016. The max FAI is stem density (trees/ha) * mean DBH (dm). Peak of production indicates that more than 1/3 of trees are in the corresponding phenological phase. YR: multiple peaks in the same year.

| **Order1** | **Family** | **Species** | **Common name** | **Max FAI** | **YL** | **FL** | **RF** |
| --- | --- | --- | --- | --- | --- | --- | --- |
| **Clade: Magnoliids** | |  |  |  |  |  |  |
| Laurales | Lauraceae | *Cryptocarya lacrimans* | Viary | 10.4 | Oct-Dec | Nov-Dec | Dec-Jan |
|  |  | *Cryptocarya* sp. 1 | Remilaza | 0.5 | Nov-Jan | Dec-Jan | Jan |
|  |  | *Cryptocarya* sp. 2 | Tavolohazo | 16.5 | Oct-Jan | Nov-Dec | Jan |
|  |  | *Ocotea racemosa* | Varongy | 28.9 | Oct-Jan | Nov-Dec | Jan-Feb |
|  |  | *Ocotea* sp. | Valotry | 5.3 | Oct-Dec | Oct-Nov | Jan |
|  |  | *Potameia madagascariensis* | Tsalela | 0.4 | Oct-Jan | Oct-Nov | Dec-Jan |
|  | Monimiaceae | *Tambourissa religiosa* | Ambora | 16.2 | Oct-Dec | Nov-Dec | Feb |
|  |  | *Tambourissa trichophylla* | Bety | 0.4 | Oct-Jan | Nov | Dec-Jan |
| Magnoliales | Annonaceae | *Monanthotaxis madagascariensis* | Rangomafotry | 12.5 | Oct-Jan | Nov-Dec | Dec-Feb |
|  |  | *Polyalthia* sp. | Hazaomby | 0.3 | Nov-Feb | Jan-Feb | Mar-Apr |
|  |  | *Xylopia* sp. | Fotsivavy | 18.6 | Oct-Jan | Oct-Nov | Dec-Feb |
|  | Myristicaceae | *Brochoneura acuminata* | Mafotra | 117.3 | Nov-Jan | Nov | Dec-Feb |
| **Clade: Monocots** | |  |  |  |  |  |  |
| Alismatales | Araceae | *Pothos scandens* | Mandrio | 1.0 | Sep-Dec | Nov-Dec | Jan |
| Arecales | Araliaceae | *Polyscias pentamera* | Batsiala | 1.4 | Oct-Dec | Nov-Dec | Jan |
|  |  | *Schefflera voantsilana* | Voantsila | 13.7 | Dec-Jan | Dec | Jan |
|  |  | *Cuphocarpus aculeatus* | Tsitongampossa | 4.3 | YR | YR | YR |
|  | Arecaceae | *Dypsis arenarum* | Hirihiry | 3.2 | Jan-Feb | Jan | Feb-Mar |
|  |  | *Dypsis lilacina* | Telopoloambilany | 6.1 | Feb | Feb | Mar |
|  |  | *Dypsis mananjarensis* | Lafa | 2.8 | Jan-Mar | Jan-Feb | Mar-Apr |
|  |  | *Dypsis pilulifera* | Tavilokoko | 0.5 | Feb-Mar | Feb-Mar | Mar-Apr |
| **Clade: Monocots** | |  |  |  |  |  |  |
|  |  | *Dypsis prestoniana* | Mangidy | 6.9 | YR | YR | YR |
|  |  | *Dypsis pustulata* | Vonotry | 7.6 | YR | YR | YR |
|  |  | *Orania longisquama* | Tsindro | 1.7 | Jun-Aug | Jun-Jul | Jul-Aug |
|  |  | *Ravenala madagascariensis* | Ravinala | 1.2 | Apr-May | Apr-May | May-Jul |
|  |  | *Ravenea lakatra* | Lakatry | 1.2 | Dec | Dec | Jan |
|  |  | *Ravenea* sp. | Hanivo | 4.3 | YR | YR | YR |
| Asparagales | Asparagaceae | *Dracaena reflexa* | Falinandro | 2.8 | YR | YR | YR |
|  | Iridaceae | *Aristea angustifolia* | Midinigiavy | 0.8 | Dec-Feb | Dec-Jan | Feb-Mar |
| Pandanales | Pandanaceae | *Pandanus* sp. | Fandra | 37.4 | YR | YR | YR |
| **Clade: Eudicots** | |  |  |  |  |  |  |
| Asterales | Asteraceae | *Brachylaena* sp. | Hazotona | 3.2 | Oct-Feb | Nov-Dec | Jan |
|  |  | *Centauropsis antanossi* | Fotsivaliky | 3.1 | Nov-Feb | Nov-Dec | Jan-Feb |
| Boraginales | Boraginaceae | *Ehretia macrocarpa* | Vatoa | 5.3 | Aug-Jan | Nov-Dec | Jan-Feb |
| Brassicales | Capparaceae | *Crateva obovata* | Faritraty | 2.6 | Nov-Feb | Dec-Jan | Jan-Feb |
| Buxales | Buxaceae | *Buxus angustifolia* | Retsiriky | 0.7 | YR | Nov-Dec | Jan |
|  |  | *Didymeles perrieri* | Fanala | 0.3 | Sep-Dec | Nov | Dec-Jan |
| Caryophyllales | Asteropeiaceae | *Asteropeia micraster* | Fanolantolo | 0.6 | Nov-Feb | Dec-Jan | Jan-Mar |
|  |  | *Asteropeia multiflora* | Fanolabemavao | 3.1 | YR | YR | YR |
|  |  | *Asteropeia rhopaloides* | Fanola | 3.7 | Aug-Jan | Nov-Dec | Dec-Feb |
|  | Physenaceae | *Physena madagascariensis* | Retsonzo | 0.8 | Oct-Dec | Oct | Nov-Dec |
| Celastrales | Celastraceae | *Brexiella* sp. | Resilaitry | 2.6 | Sep-Jan | Nov-Dec | Jan-Feb |
|  |  | *Cassine micrantha* | Harambohazo | 3.7 | Sep-Jan | Nov-Dec | Dec-Feb |
|  |  | *Polycardia orientalis* | Tsimahasoky | 2.3 | Oct-Jan | Oct-Nov | Dec-Jan |
|  |  | *Polycardia phyllantoides* | Fandrianakanga | 2.9 | Oct-Jan | Nov-Dec | Dec-Jan |
| Crossosomatales | Aphloiaceae | *Aphloia theiformis* | Fandramana | 5.8 | Oct-Jan | Nov-Dec | Dec-Feb |
| **Clade: Eudicots** | |  |  |  |  |  |  |
| Cucirbitales | Anisophylleaceae | *Anisophyllea phallax* | Hazomamy | 5.3 | Nov-Jan | Nov | Dec-Feb |
| Dilleniales | Dilleniaceae | *Dillenia triqueta* | Varikanda | 16.2 | Oct-Jan | Dec | Jan-Feb |
| Ericales | Ebenaceae | *Diospyros* sp. 1 | Hazomety | 22.6 | Nov-Jan | Nov-Dec | Dec-Feb |
|  |  | *Diospyros* sp. 2 | Hazomasy | 4.1 | Oct-Jan | Oct-Nov | Dec-Jan |
|  | Lecythidaceae | *Barringtonia* sp. | Kamboky | 1.3 | Oct-Feb | Nov-Dec | Dec-Feb |
|  | Primulaceae | *Oncostemum* sp. 1 | Hazotoho | 3.6 | Nov-Jan | Dec | Jan |
|  |  | *Oncostemum* sp. 2 | Lona | 6.8 | Oct-Jan | Nov-Dec | Jan |
|  | Sapotaceae | *Capurodendron androyense* | Hazomiteraky | 8.8 | Oct-Feb | Nov-Dec | Jan-Mar |
|  |  | *Capurodendron pervillei* | Beladitra | 4.9 | YR | YR | YR |
|  |  | *Capurodendron* sp. | Nanto | 79.5 | Sep-Jan | Nov-Dec | Jan |
|  |  | *Chrysophyllum boivinianum* | Rehiaky | 13.3 | Sep-Jan | Oct-Nov | Dec-Feb |
|  |  | *Faucherea tampoloensis* | Natoroboky | 1.6 | Aug-Jan | Oct-Nov | Dec-Feb |
|  |  | *Mimusops* sp. | Tendrokazo | 3.7 | Sep-Jan | Nov-Dec | Jan-Feb |
|  |  | *Sideroxylon tambolokoko* | Tambolokoko | 1.1 | Oct-Dec | Dec | Jan |
| Fabales | Fabaceae | *Albizia* sp. | Mendoravy | 22.2 | Sep-Nov | Sep | Oct-Nov |
|  |  | *Calliandra thouarsiana* | Menbolazo | 3.3 | YR | Nov-Dec | Dec-Jan |
|  |  | *Cynometra cloiselii* | Voariotry | 13.6 | Oct-Jan | Oct-Nov | Nov-Dec |
|  |  | *Cynometra* sp. | Mampay | 25.8 | Nov-Feb | Nov-Dec | Dec-Feb |
|  |  | *Dalbergia baronii* | Manary | 3.5 | Oct-Jan | Dec | Jan |
|  |  | *Dalbergia maritima* | Tombobisy | 4.2 | Oct-Dec | Nov-Dec | Jan-Mar |
|  |  | *Dalbergia emirnensis* | Andromena | 1.6 | Oct-Feb | Dec | Jan-Feb |
|  |  | *Indigofera* sp. | Hengitry | 1.3 | Oct-Feb | Dec-Jan | Jan-Feb |
|  |  | *Intsia bijuga* | Harandrato | 0.9 | Oct-Jan | Dec | Jan-Feb |
|  |  | *Intsia* sp. | Hintsy | 4.1 | Oct-Jan | Nov-Dec | Jan |
|  |  | *Mimosa latispinosa* | Romino | 2.0 | Oct-Jan | Dec | Jan-Feb |
| **Clade: Eudicots** | |  |  |  |  |  |  |
|  |  | *Phylloxylon* sp. | Mahasalama | 3.2 | YR | YR | YR |
|  |  | *Sylvichadsia grandiflora* | Fanamo | 9.1 | Aug-Dec | Sep-Nov | Dec-Jan |
|  |  | *Viguieranthus alternans* | Hazomallany | 10.9 | Sep-Jan | Nov | Dec-Jan |
|  |  | *Viguieranthus brevipennatus* | Kingiza | 1.3 | Nov-Apr | Dec-Jan | Jan-Feb |
| Gentianales | Apocynaceae | *Cabucala madagascariensis* | Kabokala | 3.8 | YR | YR | YR |
|  |  | [*Carissa madagascariensis*](http://www.ilerouge.org/wiki/index.php?title=Carissa_madagascariensis) | Hazolahy | 0.5 | YR | Dec-Jan | Jan-Feb |
|  |  | *Mascarenhasia speciosa* | Hazondrano | 14.1 | Nov-Mar | Dec-Jan | Jan-Mar |
|  |  | *Plectaneia* sp. | Hazomanahaky | 1.5 | YR | YR | YR |
|  |  | *Sarcostemma viminale* | Bemavao | 0.9 | Jan-Mar | Feb-Mar | Mar |
|  | Loganiaceae | *Anthocleista madagascariensis* | Lendemilahy | 2.2 | YR | YR | YR |
|  | Rubiaceae | *Bremeria* sp. 1 | Tangalavo | 1.7 | YR | YR | YR |
|  |  | *Bremeria* sp. 2 | Fantora | 5.0 | Sep-Jan | Nov | Dec-Feb |
|  |  | *Breonia* sp. | Hafovalotry | 4.0 | YR | YR | YR |
|  |  | *Canephora madagascariensis* | Hazongalala | 3.5 | Nov-Feb | Nov-Dec | Dec-Feb |
|  |  | *Canthium medium* | Fantsikaitry | 21.1 | YR | YR | YR |
|  |  | *Coffea* sp. | Manibary | 8.1 | YR | YR | YR |
|  |  | *Enterospermum* *madagascariensis* | Mangavoa | 1.7 | YR | YR | YR |
|  |  | *Gaertnera macrostipula* | Hazondengo | 3.0 | Nov-Mar | Dec-Jan | Jan-Feb |
|  |  | *Gaertnera raphaelii* | Tanatananala | 3.0 | Sep-Feb | Nov-Dec | Jan-Mar |
|  |  | *Hyperacanthus rajeriarisonae* | Taolanampossy | 3.7 | Oct-Feb | Dec | Jan-Feb |
|  |  | *Hyperacanthus* sp. | Taolana | 11.2 | Oct-Jan | Nov-Jan | Jan |
|  |  | *Ixora* sp. | Masosoraky | 3.1 | Oct-Dec | Jan | Feb |
|  |  | *Janotia macrostipula* | Valopangady | 2.5 | YR | YR | YR |
|  |  | *Peponidium* sp. | Robelo | 3.1 | Oct-Feb | Dec-Jan | Jan-Feb |
|  |  | *Psychotria* sp. 1 | Fotsivoho | 1.0 | Nov-Feb | Dec | Jan |
| **Clade: Eudicots** | |  |  |  |  |  |  |
|  |  | *Psychotria* sp. 2 | Hazombato | 0.5 | YR | YR | YR |
|  |  | *Rothmannia* sp. 1 | Taolanamainty | 2.9 | Nov-Feb | Jan | Jan-Feb |
|  |  | *Rothmannia* sp. 2 | Taolanambariky | 5.3 | YR | YR | YR |
|  |  | *Rothmannia thouarsii* | Valopossy | 0.6 | Oct-Feb | Dec-Jan | Jan-Mar |
|  |  | *Saldinia proboscidea* | Lengohazo | 2.3 | Oct-Jan | Oct-Nov | Dec-Jan |
|  |  | *Saldinia* sp. | Hazondranoka | 3.0 | Oct-Dec | Jan | Feb |
| Lamiales | Acanthaceae | *Anisotes madagascariensis* | Beravy | 1.2 | Oct-Jan | Dec | Jan-Mar |
|  | Bignoniaceae | *Phyllarthron ilicifolium* | Zahambe | 0.3 | YR | Nov-Dec | Jan-Feb |
|  |  | *Phyllarthron* sp. | Zaha | 2.0 | Sep-Jan | Nov-Dec | Jan |
|  |  | *Rhodocolea* sp. | Sikondrokondro | 0.4 | Aug-Jan | Oct-Nov | Nov-Jan |
|  | Verbenaceae | *Coelocarpum humbertii* | Rombavola | 0.9 | Dec-Mar | Feb | Mar |
|  | Lamiaceae | [*Vitex beraviensis*](http://www.ilerouge.org/wiki/index.php?title=Vitex_beraviensis_var._acuminata) | Hazomahavelo | 1.8 | YR | YR | YR |
| Malpighiales | Chrysobalanaceae | *Magnistipula tamenaka* | Tamenandrano | 1.0 | Aug-Jan | Nov-Dec | Jan |
|  | Clusiaceae | *Calophyllum inophyllum* | Vitao | 52.2 | Oct-Feb | Nov-Jan | Jan-Feb |
|  |  | *Garcinia aphanophlebia* | Ditsaky | 15.6 | Oct-Feb | Dec-Jan | Jan-Feb |
|  |  | *Garcinia madagascariensis* | Betsivo | 0.5 | Oct-Dec | Nov-Dec | Jan-Feb |
|  |  | *Garcinia chapelieri* | Akily | 1.4 | YR | Nov | Dec-Jan |
|  |  | *Garcinia verrucosa* | Zambo | 5.5 | Oct-Feb | Dec | Jan-Feb |
|  |  | *Symphonia tanalensis* | Haziny | 59.9 | YR | YR | YR |
|  | Erythroxylaceae | *Erythroxylum* sp. | Menahihy | 50.5 | Oct-Jan | Nov-Dec | Jan-Feb |
|  | Euphorbiaceae | *Acalypha* sp. | Maintsoravy | 2.7 | Nov-Feb | Dec | Jan-Feb |
|  |  | *Anthostema madagascariensis* | Bamby | 15.9 | Sep-Dec | Sep-Nov | Nov-Dec |
|  |  | *Croton boiteaui* | Tolaky | 0.7 | YR | ? | ? |
|  |  | *Croton louvelii* | Singena | 1.3 | Oct-Jan | Dec-Jan | Jan |
|  |  | *Drypetes madagascariensis* | Remboky | 1.5 | Oct-Jan | Nov | Dec-Jan |
| **Clade: Eudicots** | |  |  |  |  |  |  |
|  |  | *Macaranga cuspidata* | Talaka | 0.8 | YR | YR | YR |
|  |  | *Macaranga obovata* | Mokarana | 4.9 | Oct-Feb | Oct-Dec | Dec-Feb |
|  |  | *Suregada crenulata* | Kalavelo | 1.9 | Nov-Feb | Nov-Dec | Jan |
|  | Hypericaceae | *Harungana madagascariensis* | Haronga | 2.1 | Jan-Mar | Feb-Mar | Mar-May |
|  |  | *Psorospermum nervosum* | Harongampanihy | 1.9 | Oct-Jan | Nov-Dec | Jan-Feb |
|  | Ochnaceae | *Ouratea anceps* | Hazondraotry | 15.8 | Nov-Jan | Dec-Jan | Jan-Feb |
|  |  | *Ouratea obtusifolia* | Marandravy | 1.3 | YR | Nov-Dec | Jan |
|  | Phyllanthaceae | *Cleistanthus* sp. | Tainbarika | 13.0 | Oct-Jan | Nov-Dec | Jan-Feb |
|  |  | *Flueggea virosa* | Tsimarefy | 2.2 | YR | YR | YR |
|  |  | *Thecacoris madagascariensis* | Hazondranoha | 3.4 | YR | YR | YR |
|  |  | *Uapaca ferruginea* | Hazondandy | 7.9 | Nov-Jan | Nov-Dec | Dec-Feb |
|  |  | *Uapaca thouarsii* | Voapaky | 156.0 | YR | YR | YR |
|  |  | *Wielandia leandriana* | Votakala | 4.0 | Oct-Feb | Nov-Dec | Dec-Feb |
|  |  | *Wielandia mimosoides* | Korofoky | 9.9 | YR | YR | YR |
|  | Salicaceae | *Homalium axillare* | Lapivahatry | 9.3 | YR | Nov-Jan | Jan-Mar |
|  |  | *Homalium brevipedunculatum* | Roandrano | 3.1 | YR | YR | YR |
|  |  | *Homalium microphyllum* | Hazofotsy | 52.5 | YR | Nov-Jan | Jan-Mar |
|  |  | *Ludia* sp. | Hazofotsindroka | 1.3 | YR | YR | YR |
|  |  | *Ludia spinosa* | Fantsikoho | 3.1 | Nov-Feb | Nov-Dec | Dec-Jan |
|  |  | *Scolopia erythrocarpa* | Zora | 30.1 | Sep-Nov | Nov-Dec | Dec-Jan |
|  |  | *Scolopia orientalis* | Tsimalanilamba | 2.2 | Nov-Jan | Dec-Jan | Jan |
|  | Violaceae | *Rinorea angustifolia* | Voafontsy | 1.6 | Oct-Feb | Nov-Dec | Dec-Feb |
|  |  | *Rinorea arborea* | Hazondomohy | 0.5 | Oct-Jan | Dec-Feb | Feb-Mar |
| Malvales | Malvaceae | *Dombeya oblongifolia* | Hafomena | 16.9 | Oct-Jan | Nov-Dec | Dec-Feb |
|  |  | *Dombeya* sp. 1 | Berehoky | 2.5 | Sep-Dec | Oct-Nov | Dec-Feb |
| **Clade: Eudicots** | |  |  |  |  |  |  |
|  |  | *Dombeya* sp. 2 | Valimafy | 11.6 | YR | Nov | Dec-Feb |
|  |  | *Grewia* sp. 1 | Akolahikafitra | 2.0 | Oct-Jan | Dec | Jan-Feb |
|  |  | *Grewia* sp. 2 | Hafopossy | 2.1 | Nov-Jan | Nov | Jan |
|  |  | *Grewia* sp. 3 | Vaoreoky | 1.0 | Oct-Feb | Nov-Jan | Jan-Feb |
|  | Sarcolaenaceae | *Leptolaena pauciflora* | Fonto | 7.2 | Nov-Jan | Nov-Dec | Dec-Feb |
|  |  | *Schizolaena exinvolucrata* | Sokazo | 0.9 | YR | ? | ? |
|  | Sphaerosepalaceae | *Rhopalocarpus coriaceus* | Tsilavimbinato | 1.2 | Oct-Jan | Nov-Jan | Jan-Feb |
|  |  | *Rhopalocarpus* sp. | Lombirinbarika | 0.7 | Oct-Feb | Oct-Dec | Dec-Feb |
|  | Combretaceae | *Combretum grandidieri* | Tamenaroanga | 1.0 | YR | Oct-Dec | Dec-Jan |
|  |  | *Combretum subumbellata* | Tamenakanga | 4.5 | Oct-Feb | Nov-Dec | Dec-Feb |
|  |  | *Poivrea villosa* | Voatotkala | 2.7 | Oct-Dec | Nov-Dec | Dec-Feb |
|  |  | *Terminalia fatraea* | Fatra | 1.3 | Oct-Jan | Dec | Jan |
|  |  | *Terminalia* sp. | Beranoampo | 4.8 | Nov-Jan | Nov-Dec | Dec-Feb |
|  | Melastomataceae | *Memecylon longipetalum* | Tomizo | 5.6 | Oct-Jan | Nov-Dec | Jan-Mar |
|  | Myrtaceae | *Eugenia cloiselii* | Roapasy | 22.7 | YR | YR | YR |
|  |  | *Eugenia* sp. 1 | Mahalaza | 0.4 | YR | YR | YR |
|  |  | *Eugenia* sp. 2 | Robavy | 12.3 | YR | YR | YR |
|  |  | *Syzygium* *emirnensis* | Rotry | 122.5 | YR | YR | YR |
| Oxalidales | Cunoniaceae | *Weinmannia stenostachya* | Lalo | 13.4 | Oct-Feb | Oct-Dec | Jan-Feb |
|  |  | *Weinmannia baehniana* | Ringitry | 3.0 | Oct-Jan | Nov-Dec | Jan |
|  | Elaeocarpaceae | *Sloanea rhodantha* | Voandoza | 3.9 | Oct-Dec | Nov-Dec | Dec-Feb |
| Proteales | Proteaceae | *Dilobeia tenuinervis* | Hivao | 4.7 | YR | YR | YR |
|  |  | *Dilobeia thouarsii* | Tamenaky | 69.8 | Sep-Jan | Sep-Oct | Dec-Jan |
|  |  | *Faurea forficuliflora* | Tolabao | 0.3 | Dec-Jan | Dec-Jan | ? |
| Rosales | Moraceae | *Streblus dimepate* | Dipaty | 7.5 | Sep-Jan | Nov | Dec-Jan |
| **Clade: Eudicots** | |  |  |  |  |  |  |
|  |  | *Treculia africana* | Tsarepaly | 2.5 | Oct-Feb | Nov-Dec | Dec-Jan |
|  |  | *Trilepisium madagascariensis* | Vetitindaza | 1.3 | YR | YR | YR |
| Sapindales | Anacardiaceae | *Micronychia bemangidiensis* | Taranta | 12.9 | Oct-Feb | Oct-Dec | Dec-Jan |
|  |  | *Poupartia chapelieri* | Sisikandrongo | 2.2 | Aug-Feb | Nov-Dec | Jan-Mar |
|  |  | *Rhus taratana* | Fonofononanahary | 0.4 | Dec-Jan | Dec-Jan | Jan |
|  |  | *Soreindeia madagascariensis* | Voatsiringy | 0.8 | Dec-Feb | Dec-Jan | Jan |
|  | Burseraceae | *Canarium boivinii* | Haramy | 9.3 | Sep-Nov | Sep-Nov | Oct-Dec |
|  | Meliaceae | *Astrotrichilia rakodomena* | Rakodimena | 2.1 | Oct-Feb | Nov-Dec | Jan-Feb |
|  |  | *Khaya madagascariennsis* | Hazomena | 0.5 | Dec-Feb | Dec-Feb | Jan-Mar |
|  |  | *Malleastrum* sp. | Mirangasoa | 0.8 | Oct-Feb | Oct-Nov | Dec-Feb |
|  |  | *Neobeguea leandreana* | Hazolava | 2.2 | YR | YR | YR |
|  |  | *Neobeguea mahafaliensis* | Bemahova | 2.5 | YR | Nov-Dec | Dec-Feb |
|  |  | *Turraea* sp. | Tandria | 2.4 | Oct-Feb | Nov-Jan | Jan-Mar |
|  | Rutaceae | *Vepris ampody* | Ampodinala | 5.5 | Oct-Dec | Dec-Jan | Jan-Mar |
|  |  | *Vepris elliotii* | Ampoly | 3.9 | Nov-Jan | Nov-Jan | Dec-Feb |
|  |  | *Vepris fitoravina* | Fitoravina | 6.3 | Nov-Jan | Nov-Jan | Dec-Feb |
|  |  | *Zanthoxylum madagascariense* | Monongo | 2.5 | YR | YR | YR |
|  | Sapindaceae | *Allophyllus decaryi* | Malamaravy | 0.8 | YR | Oct-Dec | Nov-Jan |
|  |  | *Plagioscyphus* sp. | Takombohazo | 1.4 | Oct-Mar | YR | YR |
|  |  | *Tina fulvinervis* | Vilo | 5.4 | Nov-Feb | Dec-Jan | Jan-Mar |
|  |  | *Tina striata* | Hazomoro | 0.8 | Jan-Mar | Feb-Mar | Mar-Apr |
|  |  | *Tina thouarsiana* | Sanirambaza | 8.6 | Oct-Feb | Dec-Jan | Jan-Mar |
|  |  | *Tinopsis conjugata* | Sanira | 39.2 | YR | YR | YR |
|  | Simaroubaceae | *Quassia indica* | Mangaroky | 71.8 | YR | Oct-Dec | Dec-Feb |
| Solanales | Convolvulaceae | *Humbertia madagascariensis* | Hendranendra | 17.3 | Sep-Dec | Sep-Nov | Nov-Dec |
| **Other** | |  |  |  |  |  |  |
| NA | NA | *?* | Marotana | 1.3 | Dec-Feb | Dec | Jan-Feb |
|  |  | *?* | Bemisiry | 0.4 | Nov-Jan | Dec | Jan-Feb |
|  |  | *?* | Homamata | 0.7 | YR | YR | YR |
|  |  | *?* | Latakasosoa | 0.3 | Dec-Feb | Dec-Jan | Jan-Mar |
|  |  | *?* | Marovola | 1.5 | Oct-Feb | YR | YR |
|  |  | *?* | Masoranonandroa | 1.5 | Oct-Feb | Nov-Jan | Dec-Feb |

1 Plant classification is based on the APG IV system [Angiosperm Phylogeny Group (2016)].
